# Supplementary material
Source: MDPI journal article supplement (https://www.mdpi.com/2571-550X/6/1/19)

**Palo Alto, Texas, palaeo-channel deposit (4 m above msl, 26°0'57.0"N 97°27'33.0"W), relative pollen diagram**

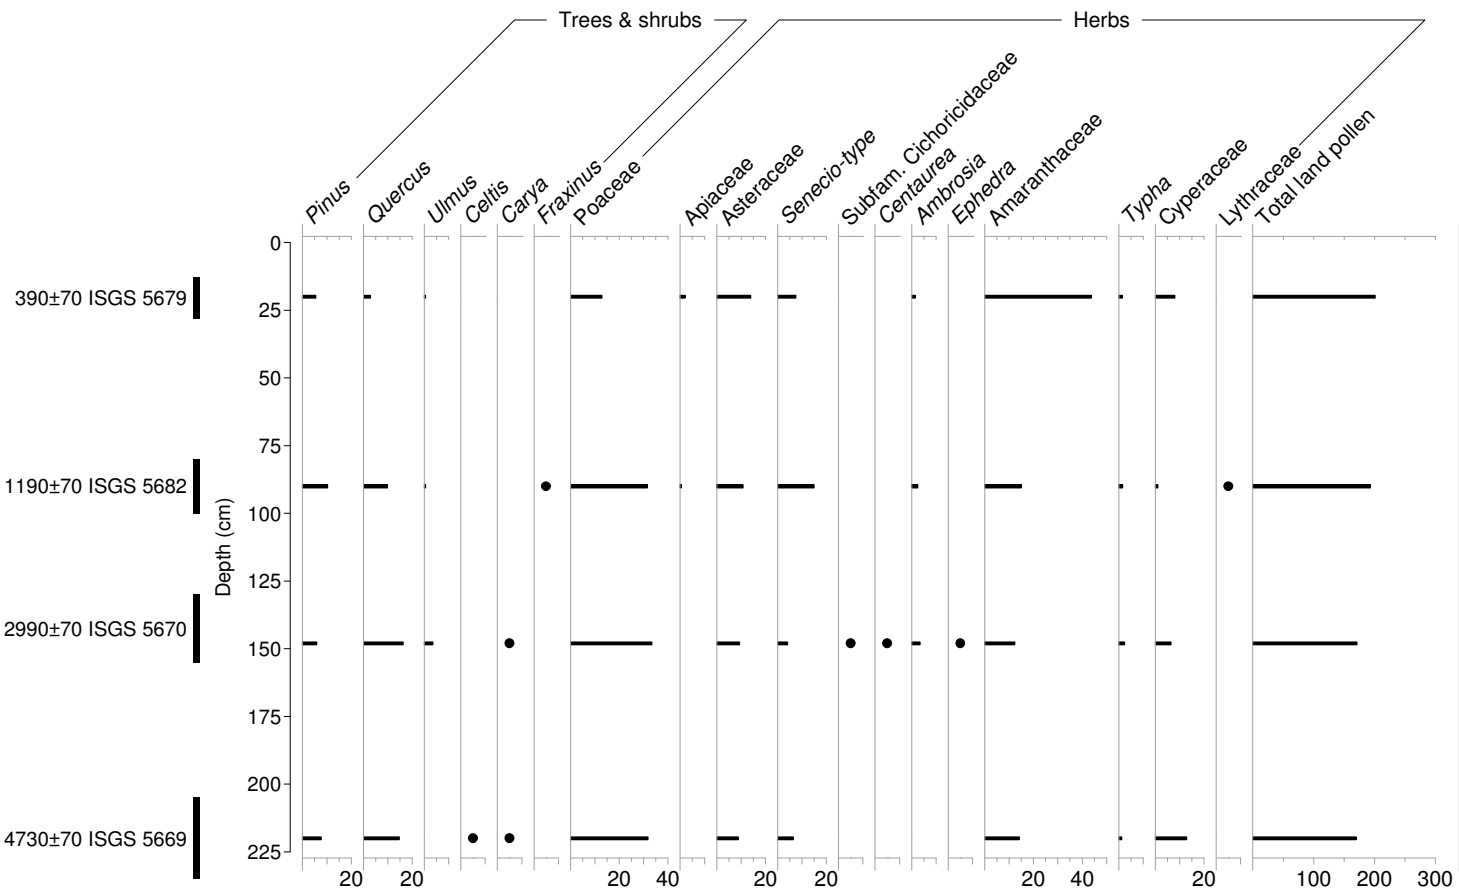

Supplement: s1 [file s1]
